# Supplementary material for: Attributions of meteorological and emission factors to the 2015 winter severe haze pollution episodes in Northern China
Source: Copernicus journal article supplement (doi:10.5194/acp-2016-798), 2016-09-21
Supplement: Supplementary file [file acp-2016-798-AC1-supplement.pdf]

Table 1 Performance statistics of near surface meteorological parameters.

|                               | IOA  | R    | STD <sub>O</sub>       | STD <sub>F</sub> | RMSE  | MB   | ME   |
|-------------------------------|------|------|------------------------|------------------|-------|------|------|
| T <sub>2</sub> <sup>a</sup>   | 0.83 | 0.88 | 3.7 K                  | 4.8              | 3.6   | -2.8 | 3.0  |
| Q <sub>2</sub> <sup>a</sup>   | 0.52 | 0.73 | 0.5 g kg <sup>-1</sup> | 0.6              | 1.0   | 1.0  | 1.0  |
| WD <sub>10</sub> <sup>a</sup> | 0.66 | 0.41 | 111.6                  | 88.8             | 119.8 | 47.1 | 74.8 |
| WS <sub>10</sub> <sup>a</sup> | 0.74 | 0.62 | 1.6 m s <sup>-1</sup>  | 1.4              | 1.5   | 0.7  | 1.2  |
| T <sub>2</sub> <sup>b</sup>   | 0.82 | 0.84 | 3.2 K                  | 4.5              | 3.4   | -2.3 | 2.8  |
| Q <sub>2</sub> <sup>b</sup>   | 0.76 | 0.79 | 0.7 g kg <sup>-1</sup> | 0.7              | 0.7   | 0.6  | 0.6  |
| WD <sub>10</sub> <sup>b</sup> | 0.61 | 0.29 | 118.7                  | 109.1            | 139.7 | 32.1 | 93.7 |
| WS <sub>10</sub> <sup>b</sup> | 0.81 | 0.68 | 1.5 m s <sup>-1</sup>  | 1.4              | 1.2   | 0.3  | 0.9  |

<sup>a</sup> and <sup>b</sup> represent December 2014 and 2015 respectively.

Table 2 Performance statistics of hourly NO<sub>2</sub> and PM<sub>2.5</sub> concentrations in December 2014 and 2015.

|                                | IOA  | R    | STD <sub>O</sub>         | STD <sub>F</sub>         | RMSE                     | MB                       | ME                      |
|--------------------------------|------|------|--------------------------|--------------------------|--------------------------|--------------------------|-------------------------|
| PM <sub>2.5</sub> <sup>a</sup> | 0.66 | 0.52 | 91.9 µg m <sup>-3</sup>  | 76.3 µg m <sup>-3</sup>  | 87.3 µg m <sup>-3</sup>  | -18.8 µg m <sup>-3</sup> | 59.3 µg m <sup>-3</sup> |
| PM <sub>2.5</sub> <sup>b</sup> | 0.66 | 0.48 | 113.0 µg m <sup>-3</sup> | 108.7 µg m <sup>-3</sup> | 112.2 µg m <sup>-3</sup> | -16.5 µg m <sup>-3</sup> | 83.2 µg m <sup>-3</sup> |

<sup>a</sup> and <sup>b</sup> represent December 2014 and 2015 respectively.

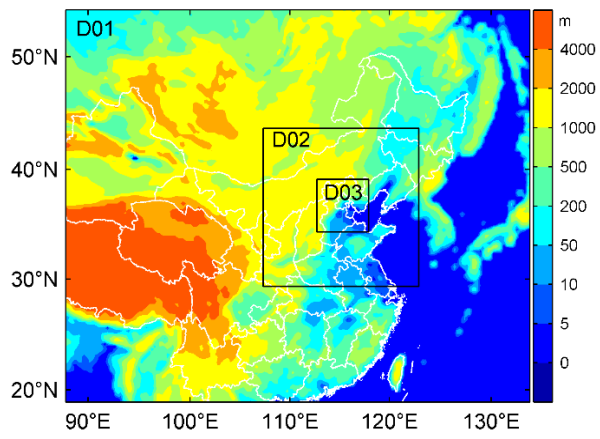

Figure S1 The three nested domains for simulation with horizontal resolutions of 27 km, 9 km and 3 km. The colour bar represents altitude, the white line represents the administrative boundaries of province.

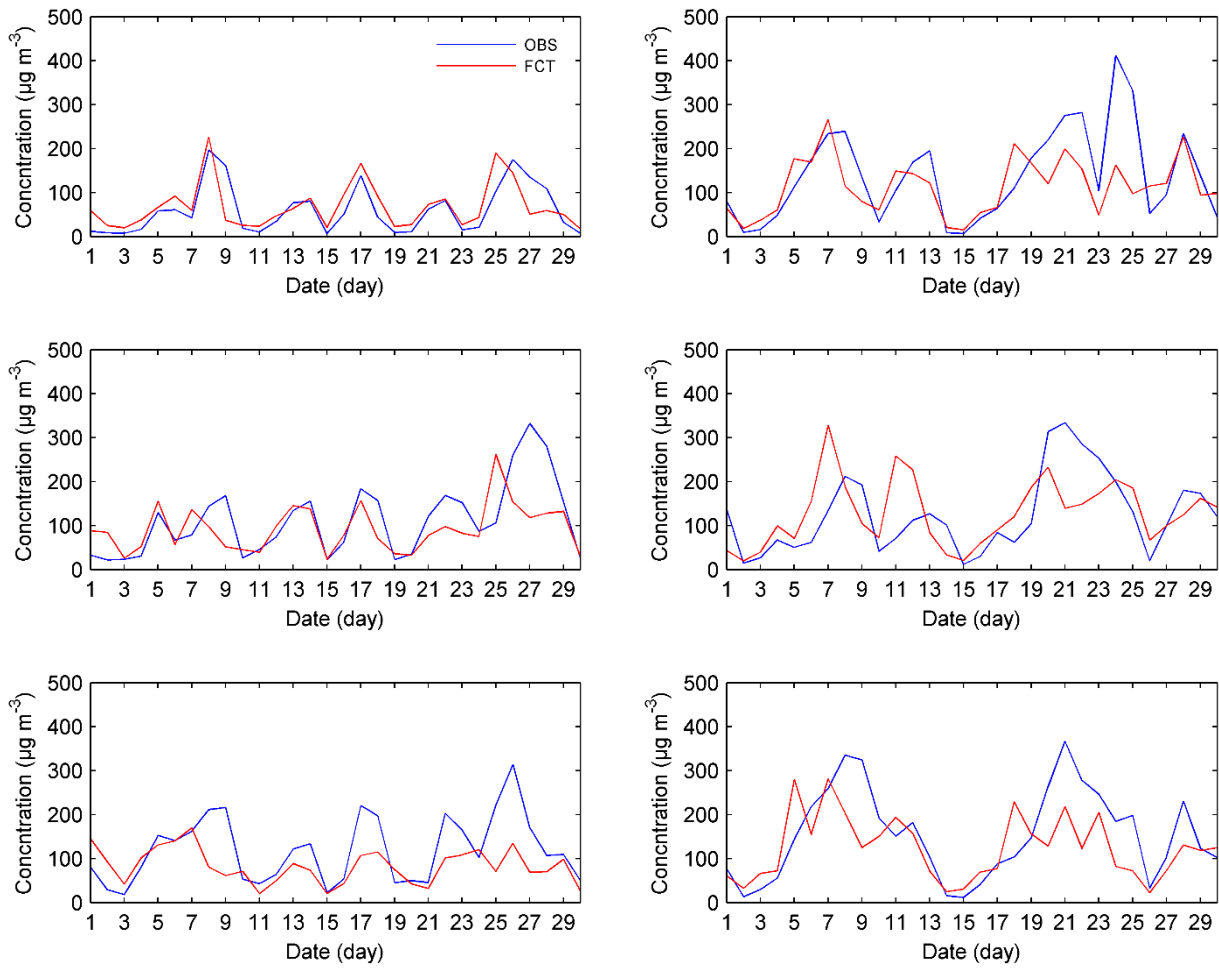

Figure S2. Comparison between observed (OBS) and simulated (FCT) daily average PM<sub>2.5</sub> concentration in Beijing (a-b), Tianjin (c-d), and Shijiazhuang (e-f) for December 2014 and 2015 respectively.

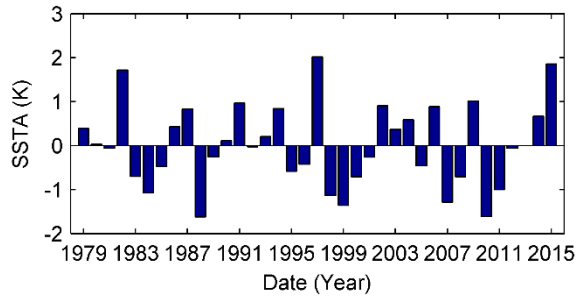

Figure S3 Time series of monthly averaged SSTA over the Niño3 region in December 1979-2015.

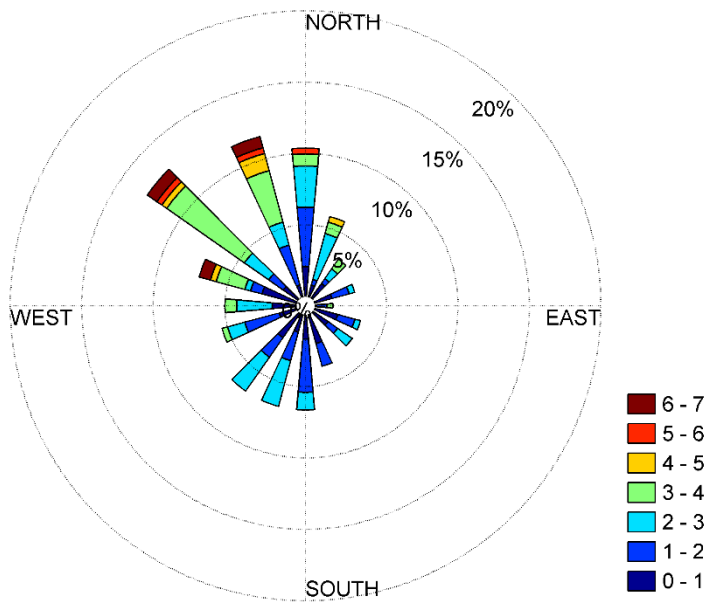

Figure S4 The observed and simulated wind frequency and directions averaged in December 2015.
